# Supplementary material for: Effects of mixed reality head-mounted glasses during 90 minutes of mental and manual tasks on cognitive and physiological functions
Source: PeerJ. 2018 Nov 6;6:e5847. doi: 10.7717/peerj.5847 (PMC6225835; doi:10.7717/peerj.5847)
Supplement: Supplemental Information 1 — Conditions are codes as MRglasses or Control. Tests are presented as separated excel sheets. [file peerj-06-5847-s001.xlsx]

## Sheet: anthropand others
						Stroop0			Stroop1			Stroop2			Stroop3			memory0		memory1		memory2		memory3		Heart rate0		Heart rate task1		Heart rate1		Heart rate task2		Heart rate2		Heart rate task3		Heart rate3		Borg				Fatigue0		Fatigue1		Fatigue2
	Sexe	glasses	Age	height	bodymass	Rep	True	Time	Rep	True	Time	Rep	True	Time	Rep	True	Time	nbre indice	nbre erreur	nbre indice	nbre erreur	nbre indice	nbre erreur	nbre indice	nbre erreur	mean	max	mean	max	mean	max	mean	max	mean	max	mean	max	mean	max	Borg0	Borg1	Borg2	Borg3	No 0 yes 1	Where	No 0 yes 1	Where	No 0 yes 1	Where
S1	F	N	32	170	52	49	50	1.2	50	51	1.18	55	55	1.09	55	55	1.09	0	0	0	0	0	0	0	0	80	94	76	96	74	87	70	86	72	87	78	91	75	88	1	1	2	2	0		1	Head	1	Head
S2	F	N	23	161	55	48	48	1.25	47	47	1.28	46	47	1.28	56	56	1.07	0	0	0	0	0	0	0	0	82	93	83	105	82	95	81	153	81	119	82	147	83	160	1	5	5	5	0		0		1	Head
S3	F	O	32	160	60	50	51	1.18	48	48	1.25	41	42	1.43	48	49	1.22	0	0	0	0	0	0	0	0	104	118	103	121	99	117	97	116	100	118	95	129	95	112	5	6	8	5	0		1	Head	1	Head
S4	F	N	21	169	82	66	69	0.87	72	73	0.82	71	73	0.82	77	78	0.77	0	0	0	0	0	0	0	0	79	97	80	115	78	108	82	112	83	96	82	117	88	105	1	2	2	3	0		0		0
S5	F	N	23	164	64	55	56	1.07	49	51	1.18	60	60	1	54	56	1.07	0	0	0	0	0	0	0	0	87	104	87	108	87	103	84	109	84	102	82	108	83	104	4	4	4	4	0		1	Head	0
S6	M	N	40	174	74	56	59	1.02	55	55	1.09	59	60	1	58	59	1.02	0	0	0	0	0	0	0	0	76	98	81	108	80	93	81	105	80	98	82	110	73	79	1	1	2	2	0		0		0
S7	M	O	30	180	30	66	66	0.91	66	67	0.9	69	69	0.87	55	60	1	0	0	0	0	0	0	0	0	75	94	77	107	76	87	73	97	74	84	69	91	69	77	1	2	3	3	0		1	eyes	1	eyes
S8	M	N	27	175	79	56	57	1.05	56	58	1.03	58	58	1.03	63	64	0.94	0	0	0	0	0	0	0	0	82	101	73	106	78	89	69	92	75	88	67	93	74	90	1	1	1	1	0		0		0
S9	M	O	24	180	79	39	39	1.54	55	55	1.09				58	59	1.02	0	0	0	0	0	0	0	0	83	104	84	115	80	94	86	113	80	95	77	99	72	88	3	2	2	3	0		1	Head	1	Head
S10	M	N	25	180	62	67	67	0.9	71	71	0.85	67	69	0.87	66	66	0.91	0	0	0	0	0	0	0	0	92	111	87	111	93	109	83	113	89	109	85	116	92	106	2	2	2	2	0		0		1	Head
S11	M	N	22	179	93	48	48	1.25	53	54	1.11	57	57	1.05	66	0.91	0.97	0	0	0	0	0	0	0	0	90	114	77	104	80	95	74	101	76	91	73	111	71	93	1	4	2	2	0		0		1	neck
S12	M	O	27	180	75	55	55	1.09	60	62	0.97	64	66	0.97	64	66	0.91	0	0	0	0	0	0	0	0	62	65	73	104	77	95	69	95	74	95	69	70	73	94	5	3	3	2	0
Women	5	mean	26.2	164.8	62.6	53.6	54.8	1.114	53.2	54	1.142	54.6	55.4	1.124	58	58.8	1.044	0	0	0	0	0	0	0	0	86.4	101.2	85.8	109	84	102	82.8	115.2	84	104.4	83.8	118.4	84.8	113.8	2.4	3.6	4.2	3.8	0		0.6		0.6
		SD	4.79166	4.0694	10.5376	6.65132	7.57364	0.13544	9.45304	9.63328	0.165699	10.5565	10.7815	0.213035	9.89949	9.94786	0.148	0	0	0	0	0	0	0	0	9.22171	9.23905	9.32523	8.5557	8.6487	10.3537	8.61162	21.5907	9.05539	12.4676	5.81034	18.9272	6.58483	24.4	1.74356	1.85472	2.22711	1.16619	0		0.489898		0.489898
Men	7	mean	27.8571	178.286	70.2857	55.2857	55.8571	1.10857	59.4286	60.2857	1.00571	62.3333	63.1667	0.965	61.4286	53.5586	0.967143	0	0	0	0	0	0	0	0	80	98.1429	78.8571	107.857	80.5714	94.5714	76.4286	102.286	78.2857	94.2857	74.5714	98.5714	74.8571	89.5714	2	2.14286	2.14286	2.14286	0		0.333333		0.666667
		SD	5.48839	2.43277	18.4988	9.03508	9.14062	0.207256	6.2073	6.13455	0.0943939	4.60676	5.01387	0.0715891	4.06579	21.6834	0.04463	0	0	0	0	0	0	0	0	9.42641	14.9993	4.96929	3.68117	5.28764	6.54342	6.36637	7.79586	4.9775	7.43955	6.4555	14.6078	7.15998	9.05313	1.41421	0.989743	0.638877	0.638877	0		0.471405		0.471405
All	12	mean	27.1667	172.667	67.0833	54.5833	55.4167	1.11083	56.8333	57.6667	1.0625	58.8182	59.6364	1.03727	60	55.7425	0.999167	0	0	0	0	0	0	0	0	82.6667	99.4167	81.75	108.333	82	97.6667	79.0833	107.667	80.6667	98.5	78.4167	106.833	79	99.6667	2.16667	2.75	3	2.83333	0		0.454545		0.636364
		SD	5.2731	7.38617	16.1321	8.16964	8.53872	0.180853	8.31498	8.37987	0.145438	8.77826	9.02796	0.172315	7.30297	17.9493	0.108279	0	0	0	0	0	0	0	0	9.86013	13.0029	7.89647	6.22272	7.0946	9.11348	8.02557	16.4384	7.52034	11.0416	7.68612	19.2173	8.48528	20.9417	1.57233	1.58771	1.82574	1.21335	0		0.49793		0.481046
																																								2.6875	1.5963
						Stroop0			Stroop1			Stroop2			Stroop3			memory0		memory1		memory2		memory3		Heart rate0		Heart rate task1		Heart rate1		Heart rate task2		Heart rate2		Heart rate task3		Heart rate3		Borg				Fatigue0		Fatigue1		Fatigue2
	Sexe	glasses	Age	height	bodymass	Rep	True	Time	Rep	True	Time	Rep	True	Time	Rep	True	Time	nbre indice	nbre erreur	nbre indice	nbre erreur	nbre indice	nbre erreur	nbre indice	nbre erreur	mean	max	mean	max	mean	max	mean	max	mean	max	mean	max	mean	max	Borg0	Borg1	Borg2	Borg3	No 0 yes 1	Where	No 0 yes 1	Where	No 0 yes 1	Where
S1	F	N	32	170	52	50	50	1.2	57	59	1.02	54	55	1.09	57	59	1.02	0	0	0	0	0	0	0	0	82	95	82	115	80	92	77	108	75	88	79	199	84	141	1	1	1	1	0		0		0
S2	F	N	23	161	55	38	38	1.58	46	46	1.3	39	42	1.43	53	54	1.11	0	0	0	0	0	0	0	0	90	120	94	119	84	104	93	130	88	98	91	93	93	101	1	4	2	4	0		0		0
S3	F	O	32	160	60	46	47	1.28	46	46	1.3	47	47	1.28	51	51	1.18	0	0	0	0	0	0	0	0	94	109	97	121	92	107	92	115	91	108	93	118	96	115	3	4	4	4	0		0		0
S4	F	N	21	169	82	63	64	0.94	69	72	0.83	73	73	0.82	70	71	0.85	1	0	0	0	0	0	0	0															4	5	3	3	0		0		0
S5	F	N	23	164	64	40	41	1.46	53	53	1.13	54	55	1.13	54	55	1.09	0	0	0	0	0	0	0	0	82	101	85	119	87	119	84	115	84	96	82	104	81	98	2	4	2	2	0		0		0
S6	M	N	40	174	74	63	63	0.95	60	62	0.87	63	64	0.94	65	67	0.9	0	0	0	0	0	0	0	0	90	102	90	115	83	84	87	117	89	98	85	105	86	96	1	1	1	1	0		0		0
S7	M	O	30	180	83	51	51	1.18	56	58	1.03	55	55	1.09	61	61	0.98	0	0	0	0	0	0	0	0	70	83	81	108	75	90	76	125	72	85	72	122	72	90	2	3	3	3	1		0		0
S8	M	N	27	175	79	63	64	0.94	69	69	0.87	69	70	0.86	69	69	0.87	0	0	0	0	0	0	0	0	74	87	72	105	77	95	67	103	74	91	68	99	73	90	1	1	1	1	0		0		0
S9	M	O	24	180	75	59	59	1.02	63	64	0.94	66	67	0.9	55	57	1.05	0	0	0	0	1	0	0	0	76	94	86	135	87	94	83	117	80	100	85	117	76	90	1	2	2	2	0		0		0
S10	M	N	25	180	62	62	62	0.97	58	60	1	64	64	0.94	64	66	0.91	0	0	0	0	0	0	0	0	97	116	97	137	98	119	95	136	95	136	93	119	95	114	2	2	2	2	0		0		0
S11	M	N	22	179	93	63	63	0.95	68	69	0.87	70	70	0.86	70	70	0.86	0	0	0	0	0	0	0	0	84	99	80	108	78	98	78	113	75	83	74	107	80	92	1	1	1	1	0		0		0
S12	M	O	27	180	75	69	73	0.82	72	73	0.82	71	73	0.81	69	72	0.83	0	0	0	0	0	0	0	0	78	97	78	123	79	100	78	112	69	98	79	119	84	112	2	1	1	1	0		0	0	0
Women	5	mean	26.2	164.8	62.6	47.4	48	1.292	54.2	55.2	1.116	53.4	54.4	1.15	57	58	1.05	0.2	0	0	0	0	0	0	0	87	106.25	89.5	118.5	85.75	105.5	86.5	117	84.5	97.5	86.25	128.5	88.5	113.75	2.2	3.6	2.4	2.8	0		0		0
		SD	4.79166	4.0694	10.5376	8.89044	9.05539	0.220762	8.51822	9.70361	0.178281	11.2534	10.5376	0.204059	6.78233	6.9857	0.11225	0.4	0	0	0	0	0	0	0	5.19615	9.36416	6.18466	2.17945	4.38035	9.60469	6.5	8.03119	6.0208	7.1239	5.88961	41.6563	6.18466	16.9908	1.16619	1.35647	1.0198	1.16619	0		0		0
Men	7	mean	27.8571	178.286	77.2857	61.4286	62.1429	0.975714	63.7143	65	0.914286	65.4286	66.1429	0.914286	64.7143	66	0.914286	0	0	0	0	0.142857	0	0	0	81.2857	96.8571	83.4286	118.714	82.4286	97.1429	80.5714	117.571	79.1429	98.7143	79.4286	112.571	80.8571	97.7143	1.42857	1.57143	1.57143	1.57143	0.142857		0		0
		SD	5.48839	2.43277	8.76216	5.0669	6.05755	0.100407	5.62429	5.07093	0.0718843	5.09502	5.48839	0.0838122	4.9775	4.89898	0.0706818	0	0	0	0	0.349927	0	0	0	8.85945	9.9632	7.66918	12.2441	7.36511	10.176	8.22639	9.70798	8.83869	16.4205	8.12153	8.1391	7.56738	9.88092	0.494872	0.728431	0.728431	0.728431	0.349927		0		0
All	12	mean	27.1667	172.667	71.1667	55.5833	56.25	1.1075	59.75	60.9167	0.998333	60.4167	61.25	1.0125	61.5	62.6667	0.970833	0.0833333	0	0	0	0.0833333	0	0	0	83.3636	100.273	85.6364	118.636	83.6364	100.182	82.7273	117.364	81.0909	98.2727	81.9091	118.364	83.6364	103.545	1.75	2.41667	1.91667	2.08333	0.0833333		0		0
		SD	5.2731	7.38617	11.978	9.78484	10.2072	0.224727	8.40759	8.80775	0.161701	10.1527	9.86682	0.186955	6.93421	7.06321	0.112432	0.276385	0	0	0	0.276385	0	0	0	8.20502	10.7457	7.73743	9.85599	6.63699	10.7519	8.15855	9.13806	8.3389	13.7978	8.08427	27.0531	7.99173	15.0536	0.924211	1.44097	0.953794	1.11492	0.276385		0		0
[truncated: 2 more columns]

## Sheet: balance bipodal
		Balance																Electromyography
		Test0				Test1				Test2				Test3				EMG0						EMG1						EMG2						EMG3
	MRGlasses	Surface	Length X	Length Y	speed	Surface	Length X	Length Y	speed	Surface	Length X	Length Y	speed	Surface	Length X	Length Y	speed	Trapeze	Deltoïde	Long Biceps	Grand dorsal	Soléaire	Tibial	Trapeze	Deltoïde	Long Biceps	Grand dorsal	Soléaire	Tibial	Trapeze	Deltoïde	Long Biceps	Grand dorsal	Soléaire	Tibial	Trapeze	Deltoïde	Long Biceps	Grand dorsal	Soléaire	Tibial
	S1	124.58	294.54	158.27	7.17	271.34	370.75	211.24	9.1	302.03	450.93	232.41	10.74	194.24	441.52	231.24	10.55	0.02	0.004	0.022	0.007	0.036	0.01	0.01	0.004	0.005	0.006	0.041	0.006	0.019	0.004	0.004	0.006	0.044	0.005	0.018	0.004	0.004	0.006	0.043	0.006
	S2	18.79	220.38	104.66	5.16	27.14	199.64	98.28	4.71	85.4	275.54	157.65	6.86	106.35	234.2	144.86	6.03	0.00387	0.00841	0.00424	0.00764	0.04358	0.00496	0.0039	0.00446	0.00421	0.00747	0.0355	0.0047	0.00385	0.00495	0.00424	0.00762	0.02944	0.00911	0.00389	0.00706	0.00435	0.00776	0.03369	0.00654
	S3	18.16	114.53	130.08	3.78	75.03	135.07	178.91	4.87	33.41	176.54	128.39	4.75	70.23	111.42	184.85	4.6	0.01804	0.00506	0.00448	0.02172	0.02693	0.01747	0.0246	0.00466	0.01746	0.01214	0.00991	0.00513	0.01612	0.00453	0.00451	0.01091	0.02718	0.00564	0.02384	0.00565	0.0059	0.01191	0.01902	0.00475
	S4	43.27	278.33	108.45	6.23	49.43	250.36	108.37	5.75	45.42	263.47	107.44	5.92	51.8	307.43	114.27	6.84	0.01609	0.00453	0.00405	0.00628	0.00919	0.06279	0.00789	0.00438	0.0041	0.00574	0.00707	0.03687	0.0138	0.00468	0.00417	0.00667	0.00562	0.02271	0.00969	0.00472	0.00422	0.0143	0.00816	0.05206
	S5	30.7	257.93	113.45	5.88	81.86	308.71	122.94	6.95	46.29	276.71	122.09	6.38	34.99	262.46	110.32	5.98	0.03215	0.00419	0.00401	0.01135	0.00808	0.00532	0.04003	0.00887	0.0079	0.01036	0.00875	0.0076	0.01335	0.00451	0.00477	0.01085	0.00828	0.00679	0.06665	0.00432	0.00375	0.01105	0.00761	0.00587
	S6	54.58	280.61	141.72	6.67	117.1	235.09	147.02	5.96	84.46	243.92	150.86	6.17	79.27	238.24	148.42	6.04	0.00396	0.01276	0.00411	0.01326	0.02648	0.01274	0.00393	0.00485	0.00406	0.01811	0.02783	0.01805	0.0036	0.00762	0.00407	0.02362	0.02268	0.0157	0.00392	0.00871	0.00406	0.01346	0.02875	0.01364
	S7	324.97	272.5	325.03	9.25	97.83	184.57	201.27	5.93	123	271.05	273.96	8.6	184.54	293.89	287.89	8.99	0.00461	0.02324	0.00471	0.01517	0.05787	0.0061	0.0044	0.02924	0.0046	0.01053	0.05167	0.0052	0.00447	0.00595	0.00434	0.01034	0.05222	0.00483	0.01293	0.0347	0.02169	0.01752	0.0587	0.01897
	S8	83.96	210.52	237.35	6.82	94.34	220.98	264.83	7.48	135.34	187.41	311.39	7.76	110.68	191.77	309.95	7.75	0.00394	0.03483	0.00472	0.01491	0.03876	0.00416	0.00399	0.02127	0.00463	0.01343	0.0423	0.01385	0.01033	0.02221	0.01201	0.02193	0.04648	0.00924	0.00391	0.02111	0.00452	0.01635	0.0405	0.00709
	S9	34.36	203.94	123.96	5.11	37.04	248.24	109.55	5.67	99.49	302.8	161.4	7.29	100.52	337.55	114.48	7.37	0.00524	0.03232	0.00544	0.00932	0.03912	0.00511	0.00516	0.03738	0.00521	0.01212	0.03717	0.00439	0.00547	0.00847	0.0055	0.00744	0.03599	0.00656	0.00532	0.00919	0.0057	0.00767	0.00943	0.0138
	S10	55.74	238.06	164.06	6.26	85.42	298.84	171.99	7.37	54.06	288.45	156.37	7.03	45.14	252.38	153.01	6.39	0.01845	0.00412	0.00375	0.00911	0.04778	0.00532	0.00642	0.01207	0.00388	0.00945	0.03819	0.0048	0.01408	0.00417	0.00392	0.00963	0.0423	0.00737	0.01316	0.00423	0.00393	0.00963	0.04406	0.00523
	S11	97.99	219.93	109.07	5.19	80.1	196.13	90.19	4.56	46.28	168.28	105.8	4.26	38.97	178.21	93.13	4.29	0.00384	0.01874	0.00525	0.01565	0.03457	0.00514	0.00382	0.01403	0.00488	0.01391	0.03284	0.00535	0.00897	0.01304	0.005	0.00894	0.02105	0.00478	0.00379	0.00923	0.00468	0.02899	0.01321	0.00478
	S12	100.16	318.51	132.88	7.25	67.05	232.03	132.86	5.74	66.25	392.76	138.43	8.64	85.57	300.07	147.04	7.07	0.00396	0.0332	0.00424	0.01149	0.01575	0.01054	0.00436	0.04351	0.00679	0.01086	0.01363	0.01007	0.00387	0.00537	0.00415	0.01407	0.00666	0.01482	0.01463	0.01068	0.00419	0.01253	0.01023	0.00566
Women	mean	47.1	233.142	122.982	5.644	100.96	252.906	143.948	6.276	102.51	288.638	149.596	6.93	91.522	271.406	157.108	6.8	0.01803	0.005238	0.007756	0.010798	0.024756	0.020108	0.017284	0.005274	0.007734	0.008342	0.020446	0.01206	0.013224	0.004534	0.004338	0.00841	0.022904	0.00985	0.024414	0.00515	0.004444	0.010204	0.022296	0.015044
	SD	39.814	64.2772	19.664	1.13459	87.3742	82.1345	43.6881	1.62081	101.287	89.277	44.5116	2.02958	56.5648	107.048	45.6933	2.00845	0.00902801	0.00162638	0.00712394	0.00573419	0.0141837	0.021813	0.0133517	0.0018107	0.00505415	0.00251049	0.0146684	0.0124446	0.0050984	0.000309877	0.000271396	0.00208151	0.0142734	0.00658084	0.0221963	0.00110403	0.000756005	0.00296817	0.0140336	0.0185172
Men	mean	107.394	249.153	176.296	6.65	82.6971	230.84	159.673	6.10143	86.9829	264.953	185.459	7.10714	92.0986	256.016	179.131	6.84286	0.00628571	0.0227443	0.00460286	0.0127014	0.03719	0.00701571	0.00458286	0.0231929	0.00486429	0.01263	0.0348043	0.00881571	0.00725571	0.00954714	0.00557	0.01371	0.0324829	0.00904286	0.00823714	0.0139786	0.00696714	0.0151643	0.0292686	0.00988143
	SD	91.6676	39.386	72.0495	1.2986	23.5787	34.6186	54.9795	0.945054	31.5525	69.8542	70.5797	1.41564	45.0342	54.1605	78.5342	1.36953	0.00498817	0.0107565	0.000566536	0.00255728	0.0126899	0.00302861	0.000857816	0.0130847	0.000891914	0.0026786	0.0110747	0.00497116	0.00367884	0.0058153	0.00268076	0.00604714	0.0150607	0.00418526	0.00467172	0.00970557	0.00603532	0.00648892	0.0178298	0.00514583
All	mean	82.2717	242.482	154.082	6.23083	90.3067	240.034	153.121	6.17417	93.4525	274.822	170.516	7.03333	91.8583	262.428	169.955	6.825	0.0111792	0.01545	0.00591667	0.0119083	0.0320092	0.0124708	0.009875	0.0157267	0.00606	0.0108433	0.0288217	0.0101675	0.0097425	0.00745833	0.00505667	0.0115017	0.0284917	0.00937917	0.0149775	0.0103	0.00591583	0.0130975	0.0263633	0.0120325
	SD	80.2858	51.8526	62.2907	1.32894	59.8858	60.2354	51.1727	1.27397	70.0998	79.3964	63.5925	1.70088	50.1626	80.8912	67.7172	1.66594	0.00905533	0.0119618	0.00487338	0.00428903	0.0146744	0.0156609	0.0106732	0.0133895	0.00362066	0.00335864	0.0145363	0.00902788	0.0052329	0.00508678	0.00214283	0.00547394	0.0154759	0.00533114	0.0167815	0.00862563	0.00479932	0.00584918	0.0167129	0.0128372
		Test0				Test1				Test2				Test3				EMG0						EMG1						EMG2						EMG3
	Control	Surface	Length X	Length Y	speed	Surface	Length X	Length Y	speed	Surface	Length X	Length Y	speed	Surface	Length X	Length Y	speed	Trapeze	Deltoïde	Long Biceps	Grand dorsal	Soléaire	Tibial	Trapeze	Deltoïde	Long Biceps	Grand dorsal	Soléaire	Tibial	Trapeze	Deltoïde	Long Biceps	Grand dorsal	Soléaire	Tibial	Trapeze	Deltoïde	Long Biceps	Grand dorsal	Soléaire	Tibial
	S1	123.4	381.96	211.23	9.35	193.28	386.76	208.14	9.3	157.82	331.81	207.17	8.41	162.77	318.28	192.97	7.98	0.01179	0.00424	0.00555	0.00714	0.04108	0.00523	0.00659	0.00435	0.00604	0.00637	0.04507	0.00613	0.01823	0.00446	0.00543	0.00665	0.0442	0.00528	0.00738	0.00428	0.00508	0.00611	0.04486	0.00527
	S2	85.2	234.32	257.65	7.61	182.87	279.7	289.7	8.83	152.36	255.47	279.07	8.21	170.94	226.04	228.9	6.99	0.00386	0.04276	0.00446	0.00633	0.02435	0.00438	0.00382	0.0054	0.00431	0.00659	0.02821	0.00474	0.00389	0.02548	0.00446	0.00629	0.02309	0.00719	0.00393	0.01816	0.00436	0.00614	0.03459	0.00525
	S3	36.62	124.78	189.46	4.86	110.5	139.11	199.15	5.24	68.84	131.62	162.05	4.51	60.6	131.47	183.21	4.87	0.00441	0.04985	0.00496	0.00975	0.0216	0.00543	0.00472	0.03215	0.00477	0.01063	0.02389	0.00611	0.00542	0.03922	0.00443	0.01701	0.03928	0.01154	0.00442	0.03416	0.00458	0.00979	0.03034	0.00578
	S4	37.54	193.71	109.33	4.75	73.66	271	124.6	6.29	81.68	309.2	120.31	6.94	76.82	302	112.29	6.7	0.00689	0.00455	0.005	0.00648	0.00601	0.0111	0.01168	0.00462	0.00418	0.00714	0.00793	0.01357	0.00802	0.00445	0.00405	0.00699	0.00466	0.02997	0.01068	0.00471	0.00445	0.00812	0.00485	0.00722
	S5	25.97	229.43	93.34	5.15	57.64	214.15	113.15	5.12	42.9	272.33	109.83	6.15	29.71	231.31	95.13	5.23	0.00393	0.08664	0.00427	0.00888	0.01048	0.00963	0.00419	0.06444	0.00453	0.00977	0.01325	0.00595	0.00413	0.04031	0.00434	0.01047	0.01173	0.00625	0.00428	0.01209	0.00458	0.01305	0.00799	0.00728
	S6	93.13	290.37	165.4	7.08	91	279.05	149.06	6.73	35.25	215.94	105.99	5.07	128.7	300.23	170.42	7.33	0.02696	0.00423	0.00411	0.00817	0.01317	0.00406	0.00562	0.00411	0.00387	0.00962	0.01751	0.00439	0.00958	0.00418	0.00433	0.00785	0.01083	0.00264	0.00618	0.00407	0.00078	0.00773	0.01504	0.00451
	S7	374.7	418.07	494.41	13.9	254.07	332.51	454.66	12.16	184.14	327.86	382.87	10.93	302.26	363.32	526.48	13.88	0.004	0.00951	0.0041	0.01617	0.05331	0.0089	0.00477	0.01702	0.00542	0.01002	0.05399	0.00508	0.00418	0.00574	0.00422	0.00968	0.05602	0.00509	0.00421	0.00592	0.00427	0.01136	0.05677	0.00528
	S8	38.27	358.1	151.32	8.2	32.05	268.14	172.63	6.84	30.32	250.36	147.98	6.23	50.36	236.41	135.41	5.77	0.02479	0.00428	0.00392	0.01895	0.02395	0.00435	0.01236	0.00454	0.00427	0.01718	0.04154	0.00525	0.01089	0.00443	0.00409	0.01911	0.04087	0.00495	0.01324	0.00455	0.00425	0.02478	0.0395	0.00524
	S9	23.35	202.14	106.93	4.85	45.44	280.19	147.52	6.73	55.06	324.18	117.01	7.17	55.42	316.04	131.82	7.22	0.04556	0.0051	0.00403	0.01119	0.02197	0.00435	0.0306	0.00506	0.00403	0.01836	0.02254	0.00657	0.01442	0.00484	0.00436	0.02012	0.00473	0.04153	0.03154	0.00483	0.00388	0.01613	0.01651	0.00896
	S10	26.36	201.25	171.18	5.75	35.73	253.35	158.63	6.44	36.31	205.41	151.62	5.56	33.78	210.41	152	5.63	0.00366	0.03227	0.00523	0.01099	0.04468	0.00504	0.00397	0.06669	0.00597	0.01104	0.04307	0.00505	0.004	0.055	0.00548	0.01144	0.04201	0.00504	0.00393	0.04236	0.0054	0.01212	0.04313	0.00535
	S11	16.95	131.14	90.89	3.46	17.01	158.55	85.09	3.85	41.08	189.39	84.03	4.36	49.23	207.1	98.58	4.86	0.01257	0.00436	0.00384	0.01087	0.00818	0.00505	0.00908	0.00435	0.00394	0.01304	0.01614	0.00498	0.0052	0.00427	0.00383	0.01232	0.02078	0.00475	0.01196	0.0043	0.00384	0.01291	0.01743	0.00484
	S12	59.69	227.99	137.13	5.71	61.93	271.35	133.82	6.41	37.1	216.7	121.86	5.29	65.48	295.81	163.29	7.21	0.00374	0.0698	0.00462	0.019	0.00948	0.00887	0.00375	0.03435	0.00424	0.01192	0.00736	0.01276	0.00378	0.01799	0.00398	0.0126	0.0102	0.00496	0.00375	0.00665	0.00388	0.01195	0.00903	0.00702
Women	mean	61.746	232.84	172.202	6.344	123.59	258.144	186.948	6.956	100.72	260.086	175.686	6.844	100.168	241.82	162.5	6.354	0.006176	0.037608	0.004848	0.007716	0.020704	0.007154	0.0062	0.022192	0.004766	0.0081	0.02367	0.0073	0.007938	0.022784	0.004542	0.009482	0.024592	0.012046	0.006138	0.01468	0.00461	0.008642	0.024526	0.00616
	SD	37.0094	84.2125	62.12	1.83344	55.4699	81.5801	64.0147	1.77569	46.15	69.615	62.0789	1.43225	56.5734	66.3391	50.6479	1.15184	0.00301841	0.0309412	0.000450129	0.0013618	0.0122452	0.00268591	0.00290094	0.0236353	0.00066785	0.0017541	0.0129224	0.00317723	0.00535088	0.0158523	0.00046705	0.00405132	0.0152655	0.00921389	0.00258655	0.0110077	0.000249319	0.00259584	0.0155508	0.000910231
Men	mean	90.35	261.294	188.18	6.99286	76.7471	263.306	185.916	7.02286	59.8943	247.12	158.766	6.37286	97.89	275.617	196.857	7.41429	0.0173257	0.0185071	0.00426429	0.01362	0.0249629	0.00580286	0.0100214	0.0194457	0.00453429	0.0130257	0.0288786	0.00629714	0.00743571	0.0137786	0.00432714	0.0133029	0.0264914	0.00985143	0.0106871	0.0103829	0.00375714	0.0138543	0.0282014	0.00588571
	SD	118.615	92.5428	127.96	3.14953	75.6826	48.5256	112.667	2.31077	51.2307	52.6955	94.0109	2.0356	88.0807	54.5411	136.357	2.78526	0.0147223	0.0229517	0.000457223	0.00403454	0.0163129	0.00197873	0.00888605	0.0218836	0.00076073	0.00319624	0.0159778	0.00270841	0.00389279	0.0174495	0.000502215	0.00427594	0.0182693	0.0129578	0.00925071	0.0130827	0.00131504	0.00501147	0.0167339	0.0014538
All	mean	78.4317	249.438	181.523	6.7225	96.265	261.155	186.346	6.995	76.905	252.522	165.816	6.56917	98.8392	261.535	182.542	6.9725	0.01268	0.0264658	0.0045075	0.01116	0.0231883	0.00636583	0.00842917	0.02059	0.00463083	0.0109733	0.0267083	0.006715	0.007645	0.0175308	0.00441667	0.0117108	0.0257	0.0107658	0.00879167	0.0121733	0.0041125	0.0116825	0.02667	0.006
	SD	94.7458	90.2632	105.931	2.69988	71.8096	64.4447	95.4591	2.10468	53.137	60.6625	82.649	1.82368	76.5536	62.0208	110.462	2.3133	0.0126668	0.0281934	0.00053776	0.00432899	0.0149035	0.00239448	0.00728814	0.0226704	0.000732444	0.00362471	0.0150031	0.0029546	0.0045641	0.0173791	0.000499238	0.00458832	0.0171077	0.0115969	0.00759847	0.0124426	0.00110067	0.00490523	0.0163521	0.00126349

## Sheet: glass task
		Balance																Electromyography
		Test0				Test1				Test2				Test3				EMG0						EMG1						EMG2						EMG3
	MRGlasses	Surface	Length X	Length Y	speed	Surface	Length X	Length Y	speed	Surface	Length X	Length Y	speed	Surface	Length X	Length Y	speed	Trapeze	Deltoïde	Long Biceps	Grand dorsal	Soléaire	Tibial	Trapeze	Deltoïde	Long Biceps	Grand dorsal	Soléaire	Tibial	Trapeze	Deltoïde	Long Biceps	Grand dorsal	Soléaire	Tibial	Trapeze	Deltoïde	Long Biceps	Grand dorsal	Soléaire	Tibial
	S1	1390.47	2008.51	2182.23	65.09	1358.25	1959.22	2083.24	62.01	1585.15	2012.68	2057.14	62.62	1365.35	2066.1	1986.8	62.82	0.073	0.074	0.052	0.036	0.064	0.046	0.063	0.07	0.056	0.032	0.062	0.025	0.058	0.08	0.049	0.031	0.064	0.02	0.051	0.084	0.054	0.03	0.061	0.031
	S2	1073.7	1037.85	927.94	30.23	1238.83	1224.9	985.6	34.25	1457.65	1155.05	1017.62	33.67	1079.84	1118.43	874.03	30.9	0.02886	0.03538	0.07025	0.03426	0.0488	0.00963	0.03121	0.04121	0.06677	0.0344	0.04786	0.0136	0.02522	0.04259	0.06445	0.03276	0.04564	0.01196	0.03114	0.04865	0.07771	0.03612	0.04523	0.00917
	S3	1141.02	1016.85	1306.03	36.14	1230.3	1038.72	1396.43	38.28	1188.42	1201.5	1453.92	41.14	1432.39	1259.8	1577.58	44.17	0.03624	0.07954	0.02524	0.04913	0.03889	0.02562	0.03713	0.0757	0.02249	0.04572	0.04281	0.0212	0.04802	0.08407	0.02684	0.04697	0.03907	0.03749	0.0474	0.08121	0.02646	0.04656	0.03866	0.03193
	S4	1034.95	1564.08	1036.29	40.48	3718.37	2154.77	1176.68	53.64	1307.2	1684.96	1064.51	43.08	1503.68	1576	1150.05	42.41	0.0504	0.0396	0.0241	0.01969	0.03053	0.02546	0.0479	0.03825	0.02437	0.01821	0.0344	0.03791	0.05191	0.04296	0.02667	0.01818	0.02611	0.0215	0.04413	0.03749	0.02469	0.03771	0.03136	0.01677
	S5	1039.25	1279.86	1146.13	37.42	1210.76	1342.17	1017.17	36.51	1427.93	1530.87	1224.91	42.79	1190.35	1412.24	1130.22	39.46	0.04723	0.06024	0.06095	0.04035	0.02131	0.02166	0.05198	0.05846	0.06379	0.03706	0.01833	0.01357	0.07301	0.05809	0.05998	0.03799	0.0265	0.0216	0.07752	0.0582	0.05996	0.03595	0.01965	0.0132
	S6	652.47	1399.8	947.78	36.42	660.56	1479	810.04	35.86	755.28	1521.16	957.53	38.63	745.54	1337.86	810.67	33.67	0.03433	0.03044	0.05091	0.04716	0.03249	0.02045	0.03172	0.04393	0.05297	0.04988	0.02962	0.01476	0.03562	0.04278	0.05702	0.05271	0.02971	0.01913	0.03095	0.03643	0.05283	0.04597	0.03313	0.019
	S7	3544.21	2092.97	3351.63	85.29	1290.21	1691.23	1937.84	56.06	1810.84	1716.81	1843.62	54.73	1234.56	1630.84	1619.2	49.9	0.04213	0.07308	0.03716	0.04879	0.06952	0.03742	0.04013	0.07124	0.03481	0.04512	0.05978	0.02794	0.04317	0.07712	0.03806	0.04628	0.06296	0.01287	0.05897	0.09411	0.05386	0.06395	0.07119	0.0264
	S8	1906.59	1087.09	1826.25	45.24	1463.43	1198.14	1726.46	45.02	2468.91	1359.73	1538.91	44.61	1610.49	1236.82	1632.84	44.36	0.02223	0.05727	0.04982	0.05167	0.03579	0.0294	0.01962	0.05849	0.05008	0.03617	0.03362	0.01997	0.02594	0.06479	0.05548	0.04243	0.03985	0.02285	0.02421	0.05748	0.06491	0.03656	0.03638	0.02579
	S9	745.86	1697.18	1012.06	42.19	898.79	1645.62	963.88	41.1	866.41	1603.48	952.85	40.13	894.68	1702.65	1052.74	43.1	0.00574	0.03197	0.0118	0.05248	0.07598	0.02642	0.00586	0.05048	0.00746	0.05204	0.06037	0.01521	0.00639	0.0487	0.008	0.05185	0.05796	0.01059	0.00604	0.05305	0.00824	0.04989	0.05083	0.01007
	S10	879.02	1457.18	1752.47	49.88	1213.84	1627.92	1607.53	50.93	1232.07	1520.09	1955.38	54.14	1113.16	1585.27	1837.97	53.39	0.10183	0.07234	0.04218	0.05194	0.05858	0.09186	0.12256	0.08929	0.0464	0.04946	0.06083	0.08608	0.11311	0.081	0.04094	0.04635	0.06122	0.07344	0.12717	0.07609	0.04014	0.04767	0.05903	0.07668
	S11	862.92	1708.86	1009.38	42.61	1263.64	1524.51	1025.17	39.53	1445.89	1549.29	965.4	39.27	1470.07	1470.46	1126.23	40.19	0.01712	0.01815	0.02536	0.02784	0.05735	0.0248	0.01905	0.02029	0.02827	0.02338	0.04645	0.01269	0.01873	0.02621	0.027	0.02108	0.05082	0.0151	0.01897	0.02434	0.0242	0.05115	0.04506	0.0151
	S12	725.31	1518.89	805.11	36.8	759.36	2149.86	1728.06	41.99	926.81	1661.18	910.42	40.52	1116.5	1843.46	981.02	44.6	0.02271	0.05399	0.0451	0.03891	0.06146	0.01591	0.01896	0.06937	0.04965	0.03884	0.06173	0.00911	0.01923	0.05804	0.05134	0.03892	0.06044	0.0141	0.02016	0.0642	0.05012	0.03962	0.05759	0.01413
Women	mean	1135.88	1381.43	1319.72	41.872	1751.3	1543.96	1331.82	44.938	1393.27	1517.01	1363.62	44.66	1314.32	1486.51	1343.74	43.952	0.047146	0.057752	0.046508	0.035886	0.040706	0.025674	0.046244	0.056724	0.046684	0.033478	0.04108	0.022256	0.051232	0.061542	0.045388	0.03338	0.040264	0.02251	0.050238	0.06191	0.048564	0.037268	0.03918	0.020414
	SD	132.841	370.91	449.014	12.0766	984.896	434.354	402.926	10.9249	135.304	317.695	378.826	9.60963	156.685	327.515	392.923	10.4782	0.0150489	0.0177477	0.0187449	0.00959477	0.0147728	0.0117194	0.0111848	0.0149755	0.019319	0.00893133	0.014483	0.00898961	0.0155402	0.0176895	0.0160233	0.00941307	0.014025	0.00829278	0.0151986	0.018146	0.0203345	0.00533696	0.0138243	0.00934269
Men	mean	1330.91	1566	1529.24	48.3471	1078.55	1616.61	1399.85	44.3557	1358.03	1561.68	1303.44	44.5757	1169.29	1543.91	1294.38	44.1729	0.0351557	0.0481771	0.0374757	0.0455414	0.0558814	0.03518	0.0368429	0.0575843	0.03852	0.0421271	0.0503429	0.0265371	0.0374557	0.0569486	0.0396914	0.0428029	0.0518514	0.0240114	0.0409243	0.0579571	0.0420429	0.04783	0.0504586	0.0267386
	SD	987.25	289.421	833.182	15.6898	281.426	265.499	418.38	6.46213	567.403	106.919	428.214	6.48406	280.382	195.065	365.355	5.91967	0.0292949	0.0199978	0.0131977	0.00842729	0.0150302	0.0239757	0.0364053	0.0205608	0.015175	0.00940249	0.0128369	0.0249368	0.0328201	0.0179749	0.0162783	0.00994106	0.0116961	0.0205297	0.0383087	0.0216882	0.0181611	0.00822038	0.012432	0.0211367
All	mean	1249.65	1489.09	1441.94	45.6492	1358.86	1586.34	1371.51	44.5983	1372.71	1543.07	1328.52	44.6108	1229.72	1519.99	1314.95	44.0808	0.0401517	0.0521667	0.0412392	0.0415183	0.0495583	0.0312192	0.04076	0.0572258	0.0419217	0.0385233	0.0464833	0.0247533	0.0431958	0.0588625	0.042065	0.0388767	0.0470233	0.0233858	0.044805	0.0596042	0.04476	0.0434292	0.0457592	0.0241033
	SD	764.952	338.327	706.838	14.6478	748.587	347.867	413.374	8.61237	442.416	221.828	409.438	7.9375	247.387	260.174	377.871	8.13633	0.0250981	0.0196674	0.0163658	0.0101215	0.0166938	0.0203595	0.0290985	0.0184452	0.017494	0.0101484	0.0142961	0.0200217	0.0278405	0.0179996	0.0164146	0.0107772	0.0139425	0.0165849	0.0311995	0.020381	0.0193655	0.00885442	0.014167	0.0175129
		Test0				Test1				Test2				Test3				EMG0						EMG1						EMG2						EMG3
	Control	Surface	Length X	Length Y	speed	Surface	Length X	Length Y	speed	Surface	Length X	Length Y	speed	Surface	Length X	Length Y	speed	Trapeze	Deltoïde	Long Biceps	Grand dorsal	Soléaire	Tibial	Trapeze	Deltoïde	Long Biceps	Grand dorsal	Soléaire	Tibial	Trapeze	Deltoïde	Long Biceps	Grand dorsal	Soléaire	Tibial	Trapeze	Deltoïde	Long Biceps	Grand dorsal	Soléaire	Tibial
	S1	1048.44	1948.65	1766.69	57.05	1001.27	1914.36	1898.24	59.08	1344.51	2091.61	2030.69	63.23	1080.5	1857.75	1895.77	58.4	0.06684	0.06506	0.04143	0.04146	0.05827	0.03313	0.06217	0.06466	0.03622	0.03645	0.05731	0.01636	0.05874	0.06101	0.03683	0.03509	0.06065	0.01458	0.04014	0.0624	0.03909	0.028	0.06001	0.01129
	S2	2925.26	997.36	2339.83	53.98	3327.97	1065.43	2259.43	52.77	2675.61	1110.95	1993.31	48.7	2064.79	1072.76	1860.23	45.98	0.04007	0.06303	0.06506	0.03525	0.04023	0.01332	0.0359	0.06373	0.05939	0.04807	0.03819	0.01188	0.02685	0.0417	0.04185	0.03156	0.03757	0.01538	0.02969	0.04256	0.05117	0.03962	0.03473	0.01091
	S3	2141.54	1022.29	2133.27	49.75	2424.32	1064.62	2206.98	51.83	3376.11	1117.46	2532.57	58.36	3750.54	1024.77	2474.02	55.79	0.02615	0.09486	0.12575	0.05766	0.06392	0.01317	0.02559	0.09046	0.11119	0.05678	0.06264	0.01979	0.0279	0.09766	0.11033	0.05567	0.06181	0.0146	0.02504	0.08787	0.0966	0.05737	0.06509	0.01753
	S4	1001.42	1631.39	918.35	40.15	1183.67	1707.5	937.93	41.67	1767.83	1766.68	1106.96	44.74	1386.51	1682.69	1131.95	43.7	0.05696	0.05113	0.0215	0.0276	0.02761	0.01624	0.04623	0.03937	0.01691	0.01871	0.02447	0.01605	0.05507	0.045	0.01791	0.02175	0.021	0.02499	0.05065	0.04292	0.01928	0.0226	0.02138	0.01896
	S5	595.27	1058.32	1296.97	36.66	1040.52	1548.6	1110.69	41.46	1157.49	1412.55	1088.73	38.9	1123.16	1204.8	1052.12	35.05	0.04466	0.10789	0.05515	0.05187	0.02596	0.03021	0.03784	0.08898	0.04932	0.03863	0.0225	0.01394	0.03794	0.07641	0.05337	0.0422	0.01906	0.01743	0.03977	0.07778	0.04749	0.04102	0.01939	0.01682
	S6	537.13	1408.1	807.89	34.61	610.27	1343.32	772.6	33.07	789.22	1352.15	896.16	34.71	723.79	1369.28	869.27	35.03	0.03883	0.05066	0.02338	0.03972	0.01906	0.01491	0.03107	0.04862	0.02357	0.0362	0.02653	0.01073	0.02423	0.0443	0.02113	0.0323	0.02742	0.00738	0.02987	0.02921	0.00193	0.03247	0.01679	0.00568
	S7	3548.37	1799.07	3006.33	75.46	3279.09	2159.76	3132.01	81.91	3800.29	2178.44	3098.98	82.15	6285.82	2360.18	3228.8	87.97	0.03909	0.04856	0.05083	0.0413	0.05754	0.04519	0.03902	0.04792	0.04726	0.04045	0.05757	0.05156	0.04167	0.05211	0.04851	0.03885	0.05924	0.03335	0.03737	0.05189	0.04472	0.03664	0.0588	0.03313
	S8	664.94	1417.16	781.58	34.49	747.96	1475.42	871.01	36.88	888.29	1529.43	898.46	37.99	961.03	1656.94	938.61	40.79	0.05063	0.07046	0.03084	0.05636	0.03062	0.04145	0.05075	0.06822	0.03343	0.04129	0.03741	0.02873	0.0474	0.05724	0.03082	0.04265	0.03815	0.02108	0.04757	0.05367	0.02875	0.04456	0.03667	0.01437
	S9	916.71	1700.97	1079.94	43.35	745.88	1464.68	1081.22	39.54	801.8	1516.78	1214.39	42.26	897.68	1415.33	1108.81	39.6	0.06971	0.16576	0.03033	0.05111	0.05707	0.01086	0.06686	0.16364	0.02697	0.05136	0.05488	0.00839	0.06069	0.15908	0.02496	0.0517	0.05379	0.01136	0.05875	0.16509	0.02594	0.05216	0.06038	0.01127
	S10	824.68	1571.31	1723.4	51.37	886.91	1465.08	1717.38	49	967.41	1546.19	1698.13	50.14	893.88	1347.15	1740.48	48.28	0.05399	0.13006	0.08378	0.04079	0.05558	0.07684	0.05452	0.15086	0.08917	0.04302	0.06024	0.08893	0.0419	0.13438	0.05682	0.04313	0.06434	0.06207	0.04925	0.14797	0.09026	0.04008	0.05874	0.0718
	S11	1326.86	1684.81	1023.97	42.56	1660.14	1512.34	1054.78	39.71	1476.76	1455	975.66	38.13	1578	1490.82	1100.76	40.3	0.04429	0.02835	0.01843	0.02079	0.03839	0.01386	0.04164	0.02708	0.01919	0.02107	0.04486	0.01427	0.03844	0.02579	0.02063	0.02122	0.04536	0.01227	0.04644	0.02721	0.01925	0.03611	0.04303	0.01007
	S12	683.52	1553.5	954.87	39.4	782.32	1575.16	1052.66	40.84	886	1602.87	985.66	40.45	697.93	1467.73	931.89	37.36	0.01463	0.11955	0.04989	0.03849	0.04592	0.01473	0.01388	0.08338	0.04446	0.03667	0.05168	0.01032	0.0129	0.07881	0.04512	0.0373	0.05184	0.00871	0.01349	0.08068	0.04331	0.03779	0.05629	0.00726
Women	mean	1542.39	1331.6	1691.02	47.518	1795.55	1460.1	1682.65	49.362	2064.31	1499.85	1750.45	50.786	1881.1	1368.55	1682.82	47.784	0.046936	0.076394	0.061778	0.042768	0.043198	0.021214	0.041546	0.06944	0.054606	0.039728	0.041022	0.015604	0.0413	0.064356	0.052058	0.037254	0.040018	0.017396	0.037058	0.062706	0.050726	0.037722	0.04012	0.015102
	SD	860.811	387.994	524.32	7.87124	929.41	342.8	554.224	6.83745	839.386	381.173	565.894	8.88145	998.859	337.784	529.917	8.47212	0.0140074	0.0213463	0.0351667	0.0108896	0.0155275	0.00865657	0.012227	0.0188855	0.0316595	0.0127598	0.0164784	0.00264311	0.0133673	0.0207538	0.0313034	0.0113233	0.0184796	0.00393654	0.0089478	0.0182093	0.0254533	0.0120309	0.0191263	0.00334171
Men	mean	1214.6	1590.7	1339.71	45.8914	1244.65	1570.82	1383.09	45.85	1372.82	1597.27	1395.35	46.5471	1719.73	1586.78	1416.95	47.0471	0.0444529	0.0876286	0.0410686	0.0412229	0.0434543	0.03112	0.0425343	0.0842457	0.0405786	0.03858	0.0475957	0.0304186	0.0381757	0.0788157	0.0354271	0.0381643	0.0485914	0.0223171	0.0403914	0.0793886	0.0363086	0.0399729	0.0472429	0.02194
	SD	981.471	136.095	740.121	13.2086	890.523	248.881	766.578	15.3839	1014.62	248.367	743.241	15.2138	1883.71	329.626	787.985	17.1322	0.0156609	0.0472466	0.0208488	0.0103807	0.0137444	0.0227871	0.0158949	0.0490701	0.0220515	0.00853393	0.0112384	0.0278029	0.0143998	0.0458437	0.0135062	0.00886978	0.0117515	0.0182554	0.0138726	0.0516968	0.0258237	0.00605531	0.01501	0.0220492
All	mean	1351.18	1482.74	1486.09	46.5692	1474.19	1524.69	1507.91	47.3133	1660.94	1556.68	1543.31	48.3133	1786.97	1495.85	1527.73	47.3542	0.0454875	0.0829475	0.0496975	0.0418667	0.0433475	0.0269925	0.0421225	0.0780767	0.0464233	0.0390583	0.0448567	0.0242458	0.0394775	0.0727908	0.0423567	0.037785	0.0450192	0.0202667	0.0390025	0.0724375	0.0423158	0.039035	0.044275	0.0190908
	SD	946.984	299.744	681.236	11.3239	946.722	296.776	701.845	12.6701	1005.14	314.371	697.365	13.1245	1578.59	349.995	704.549	14.1864	0.015044	0.0390215	0.0295481	0.0106231	0.0145145	0.0189201	0.0144882	0.040081	0.02737	0.0105187	0.014047	0.0225205	0.0140634	0.0381608	0.0241232	0.00997588	0.0155149	0.0143786	0.0121788	0.0420095	0.0266359	0.00910659	0.0172099	0.0173094

## Sheet: balance unipodal
		Balance																Electromyography
		Test0				Test1				Test2				Test3				EMG0						EMG1						EMG2						EMG3
	MRGlasses	Surface	Length X	Length Y	speed	Surface	Length X	Length Y	speed	Surface	Length X	Length Y	speed	Surface	Length X	Length Y	speed	Trapeze	Deltoïde	Long Biceps	Grand dorsal	Soléaire	Tibial	Trapeze	Deltoïde	Long Biceps	Grand dorsal	Soléaire	Tibial	Trapeze	Deltoïde	Long Biceps	Grand dorsal	Soléaire	Tibial	Trapeze	Deltoïde	Long Biceps	Grand dorsal	Soléaire	Tibial
	S1	465.34	597.18	345.38	29.31	414.46	611.49	308.26	28.87	312.17	603.72	236.58	26.95	278.92	665.25	327.76	31.35	0.036	0.006	0.016	0.017	0.065	0.076	0.031	0.004	0.005	0.008	0.064	0.061	0.031	0.004	0.005	0.008	0.054	0.044	0.03	0.004	0.007	0.02	0.058	0.064
	S2	193.5	384.04	203.07	18.32	105.88	363.21	184.3	17.07	185.66	440.46	212.2	20.37	259.63	371.18	168.12	16.98	0.01229	0.00668	0.00493	0.00764	0.05259	0.05846	0.01034	0.00742	0.00522	0.00704	0.0557	0.06424	0.01856	0.00812	0.00528	0.00798	0.05794	0.05692	0.00389	0.00566	0.0043	0.00732	0.04655	0.04065
	S3	188.73	502.57	200.79	22.55	173.33	417.83	163.49	18.62	206.23	485.79	214.19	22.25	335.24	547.88	193.91	24.26	0.03689	0.01126	0.00779	0.01195	0.05402	0.04374	0.02719	0.00468	0.00378	0.01105	0.03811	0.02734	0.02892	0.00846	0.00441	0.01982	0.03874	0.05271	0.02665	0.00457	0.0043	0.01091	0.02945	0.04099
	S4	441.83	759.83	314.95	34.32	228.39	610.96	235.53	27.18	379.74	714.66	311.73	32.48	358.41	557.89	298.1	26.85	0.01586	0.00676	0.01164	0.0078	0.05161	0.15184	0.00481	0.00492	0.00848	0.00681	0.04926	0.13256	0.00821	0.00559	0.01123	0.00737	0.04746	0.1517	0.00846	0.00404	0.01152	0.00779	0.05214	0.13784
	S5	172.4	866.94	302.99	37.88	148.57	806.47	281.56	35.07	168.34	750.15	263.11	32.72	172.19	658.52	225.97	28.57	0.06376	0.00508	0.03047	0.01182	0.08326	0.06757	0.05314	0.00449	0.01169	0.00926	0.06628	0.04681	0.04704	0.00773	0.00981	0.00882	0.05862	0.05077	0.05581	0.00434	0.00625	0.0086	0.04816	0.04052
	S6	255.56	672.8	214.68	29.01	411.39	600.49	213.33	26.48	290.26	532.18	175.58	23.15	304.54	450.29	174.03	20.07	0.02084	0.01602	0.00449	0.0234	0.06784	0.04489	0.02264	0.02073	0.00687	0.02289	0.0635	0.03545	0.01382	0.01978	0.00433	0.01432	0.07067	0.02086	0.00833	0.03181	0.00321	0.01359	0.07142	0.02782
	S7	936.18	766.95	693.43	44.36	566.56	964.02	766.96	53.59	527.48	792.76	557.79	41.76	446.56	587.22	456.18	31.86	0.00898	0.01958	0.00473	0.02267	0.07069	0.08173	0.02209	0.06006	0.00862	0.0247	0.07331	0.07376	0.0088	0.0322	0.00547	0.01845	0.07113	0.08657	0.01203	0.05668	0.00903	0.01693	0.061	0.0643
	S8	794.29	646.5	651.28	39.22	624.5	559.17	453	30.61	413.64	473.82	469.64	28.65	361.67	474.47	411.76	26.81	0.00788	0.01546	0.00534	0.01259	0.08461	0.03336	0.01431	0.01377	0.00471	0.01155	0.08072	0.01528	0.01712	0.00894	0.00482	0.01102	0.07828	0.01595	0.0145	0.00744	0.00471	0.00998	0.07197	0.01528
	S9	660.25	1861.95	777.56	85.06	472.62	1476.66	499.12	64.41	677.1	1547.83	772.2	73.92	377.59	1338.58	498.48	59.48	0.00539	0.05068	0.0062	0.01065	0.11285	0.25482	0.00524	0.03634	0.00544	0.00923	0.07973	0.09329	0.0056	0.05278	0.00627	0.01377	0.08531	0.16639	0.00533	0.03501	0.00578	0.0073	0.07559	0.07795
	S10	242.68	706	316.05	32.47	173	488.98	236.95	22.94	215.24	503.59	236.94	23.45	165.71	619.13	293.65	28.83	0.04926	0.00525	0.0333	0.03402	0.06107	0.05089	0.04955	0.00491	0.03343	0.01028	0.04697	0.0224	0.0442	0.00461	0.024	0.01063	0.05974	0.02511	0.05975	0.00467	0.02464	0.03085	0.05803	0.03074
	S11	229.91	923.39	273.2	39.56	190.01	811.26	226.62	34.31	184.71	582.98	186.8	25.34	374.11	455	116.17	19.05	0.01124	0.02047	0.01055	0.0184	0.0855	0.05752	0.00858	0.01515	0.00823	0.01806	0.06812	0.02572	0.00791	0.01197	0.00517	0.01859	0.07083	0.04629	0.00833	0.01339	0.00617	0.0244	0.06837	0.02707
	S12	304.29	1076.22	408.03	47.72	311.37	788.62	339.31	35.76	281.59	684.48	308.79	31.62	356.62	748.07	326.93	33.93	0.01151	0.00678	0.00558	0.01234	0.06776	0.18126	0.01306	0.0081	0.00437	0.01171	0.07063	0.18325	0.01385	0.006	0.00427	0.00934	0.05374	0.15455	0.01203	0.00574	0.02363	0.00879	0.0524	0.13019
Women	mean	292.36	622.112	273.436	28.476	214.126	561.992	234.628	25.362	250.428	598.956	247.562	26.954	280.878	560.144	242.772	25.602	0.03296	0.007156	0.014166	0.011242	0.061296	0.079522	0.025296	0.005102	0.006834	0.008432	0.05467	0.06639	0.026746	0.00678	0.007146	0.010398	0.051352	0.07122	0.024962	0.004522	0.006674	0.010924	0.04686	0.0648
	SD	132.035	173.492	60.0027	7.2325	107.718	158.06	55.17	6.6943	81.7563	121.817	36.9974	5.08449	65.1688	106.384	60.8718	4.8897	0.018401	0.0021388	0.00896127	0.00342963	0.0119891	0.037707	0.0170574	0.00119777	0.00288394	0.0015681	0.0102606	0.035554	0.013002	0.0017126	0.00280531	0.0047335	0.00744913	0.0404556	0.0184183	0.000605851	0.00264732	0.00470289	0.009559	0.0376169
Men	mean	489.023	950.544	476.319	45.3429	392.779	812.743	390.756	38.3	370.003	731.091	386.82	35.4129	340.971	667.537	325.314	31.4329	0.0164429	0.0191771	0.0100271	0.0191529	0.0786171	0.100639	0.0193529	0.0227229	0.0102386	0.0154886	0.0689971	0.0641643	0.0159	0.0194686	0.00776143	0.0137314	0.0699571	0.0736743	0.0171857	0.0221057	0.0110243	0.0159771	0.06554	0.0533357
	SD	277.466	398.262	209.951	17.2688	163.297	311.317	185.884	14.0034	166.25	348.975	206.256	16.8105	81.3328	291.602	132.136	12.5565	0.0141365	0.0139678	0.00968808	0.00768851	0.0163005	0.0780089	0.0136822	0.0179367	0.00959073	0.00588379	0.0106239	0.0554954	0.0121376	0.0162177	0.0066601	0.00343249	0.00981989	0.0592009	0.0176048	0.0182011	0.00845381	0.0081211	0.00787947	0.0376685
All	mean	407.08	813.697	391.784	38.315	318.34	708.263	325.702	32.9092	320.18	676.035	328.796	31.8883	315.933	622.79	290.922	29.0033	0.023325	0.0141683	0.0117517	0.0158567	0.0714	0.09184	0.0218292	0.0153808	0.00882	0.0125483	0.0630275	0.0650917	0.0204192	0.0141817	0.007505	0.0123425	0.062205	0.0726517	0.0204258	0.0147792	0.00921167	0.0138717	0.0577567	0.0581125
	SD	248.14	362.33	192.919	16.2757	167.772	286.753	165.375	13.1813	149.61	285.425	173.493	13.8928	80.6601	238.999	115.693	10.4975	0.017999	0.0122816	0.00961118	0.00738881	0.0169649	0.0651967	0.0154602	0.01624	0.00774203	0.00577252	0.0126332	0.0482123	0.0136003	0.0139204	0.00540796	0.0043485	0.0127869	0.0522287	0.0183531	0.0163875	0.00701491	0.00734125	0.0126136	0.0380689
		Test0				Test1				Test2				Test3				EMG0						EMG1						EMG2						EMG3
	Control	Surface	Length X	Length Y	speed	Surface	Length X	Length Y	speed	Surface	Length X	Length Y	speed	Surface	Length X	Length Y	speed	Trapeze	Deltoïde	Long Biceps	Grand dorsal	Soléaire	Tibial	Trapeze	Deltoïde	Long Biceps	Grand dorsal	Soléaire	Tibial	Trapeze	Deltoïde	Long Biceps	Grand dorsal	Soléaire	Tibial	Trapeze	Deltoïde	Long Biceps	Grand dorsal	Soléaire	Tibial
	S1	229.51	645.95	336.28	30.51	172.94	539.87	292.22	25.94	277.12	581.49	308.35	27.98	273.23	404.46	276.01	21.12	0.04809	0.00442	0.01548	0.0277	0.07623	0.06728	0.03105	0.00465	0.00606	0.01252	0.03996	0.05459	0.03706	0.00484	0.01301	0.01075	0.06207	0.05168	0.01219	0.00444	0.0099	0.00799	0.04776	0.04578
	S2	336.76	397.62	363.87	23.08	305.68	354.56	349.35	21.3	348.38	324.34	368.75	21.22	305.07	334.17	344.33	20.61	0.01771	0.00925	0.00542	0.00666	0.04343	0.04729	0.01345	0.01222	0.00475	0.00622	0.03649	0.03615	0.01683	0.01372	0.00505	0.00626	0.0479	0.0636	0.00404	0.00822	0.00439	0.01675	0.05702	0.07626
	S3	394.59	471.35	417.31	27.07	515.11	442.05	386.16	25.2	661.37	506.09	448.18	28.8	779.72	376.89	323.85	21.61	0.00931	0.04254	0.00526	0.00883	0.04677	0.06291	0.00455	0.05104	0.00466	0.01152	0.04724	0.0486	0.00402	0.05265	0.00504	0.01194	0.06072	0.05231	0.0044	0.06118	0.00467	0.01224	0.06507	0.02613
	S4	166.07	550.9	209.02	24.5	144.56	570.14	246.16	26.01	367.98	657.01	275.49	30.03	465.1	791.9	336.3	35.7	0.0105	0.00583	0.0126	0.00746	0.03645	0.12048	0.01009	0.0052	0.01076	0.00771	0.03318	0.10955	0.04525	0.03236	0.01909	0.00773	0.03324	0.11315	0.03142	0.02058	0.01231	0.00955	0.04203	0.15002
	S5	169.32	738.9	322.82	33.53	126.67	585.83	243.17	26.25	124.03	624.88	190.48	26.74	166.28	556.38	204.49	24.38	0.00821	0.0436	0.0053	0.01439	0.09365	0.09519	0.01214	0.05694	0.00577	0.01839	0.06122	0.06545	0.00717	0.04963	0.00441	0.01766	0.06234	0.04757	0.00615	0.05091	0.0046	0.01339	0.05771	0.04281
	S6	237.37	485.67	162.46	21.17	168.59	445.56	149.74	19.31	323.21	442.94	187.7	20	387.59	466.84	163.72	20.48	0.01764	0.00425	0.00931	0.0119	0.04139	0.03243	0.00978	0.00446	0.01347	0.00621	0.04083	0.01815	0.01706	0.00455	0.01189	0.00705	0.03129	0.04006	0.00672	0.00436	0.0076	0.00653	0.00068	0.01632
	S7	861.4	854.21	938.14	54.24	887.02	887.71	861.23	52.7	1504.78	966.35	1167.6	64.64	1250.67	940.87	1034.87	59.59	0.00779	0.01619	0.00484	0.01649	0.08048	0.05534	0.00612	0.02537	0.00541	0.01021	0.09376	0.04909	0.01725	0.03894	0.00956	0.02691	0.09584	0.06473	0.01138	0.02698	0.00507	0.01549	0.09476	0.06111
	S8	176.89	750.05	280.47	33.13	267.81	705.83	242.46	30.78	186.92	655.85	259.93	29.37	252.48	639.93	228.72	28.12	0.00897	0.00452	0.03251	0.01646	0.08071	0.02201	0.00888	0.00459	0.01249	0.01127	0.08453	0.02438	0.01097	0.00467	0.00878	0.02447	0.07928	0.01761	0.00595	0.00472	0.03175	0.02452	0.08634	0.02094
	S9	252.86	1086.75	437.72	48.78	166.13	870.75	303.89	38.13	354.6	966.48	441.25	44.72	259.43	1126.64	414.68	49.71	0.04489	0.01483	0.01004	0.01083	0.06885	0.13085	0.04435	0.02206	0.01082	0.01148	0.06862	0.06132	0.04469	0.0493	0.01123	0.01706	0.06812	0.0839	0.03806	0.0351	0.00969	0.01298	0.07707	0.08884
	S10	91.64	472.75	217.74	22.04	158.12	571.86	269.91	26.41	218.64	532.55	271.16	25.21	161.43	506.68	274.49	24.55	0.01594	0.07029	0.0068	0.01099	0.05311	0.01972	0.01311	0.06355	0.00637	0.01113	0.05298	0.03765	0.01652	0.07695	0.00662	0.01302	0.05394	0.04595	0.0149	0.06349	0.00627	0.01186	0.05342	0.03901
	S11	122.09	769	190.84	32.21	213.91	810.16	187.98	33.61	166.55	555.16	163.22	23.66	147.23	524.19	156.7	22.5	0.0166	0.00644	0.00894	0.02152	0.06115	0.02619	0.0135	0.00531	0.0082	0.02423	0.06916	0.01714	0.01346	0.00538	0.00922	0.01897	0.06319	0.0191	0.01488	0.0052	0.00501	0.02075	0.0561	0.01862
	S12	324.46	966.59	409.25	43.88	191.3	638.73	255.98	28.53	249.36	540.26	274.42	25.58	286.56	693.66	288.54	31.28	0.0144	0.01571	0.00476	0.01311	0.05226	0.16682	0.03128	0.01272	0.00408	0.01186	0.03843	0.0551	0.01086	0.00926	0.00403	0.00831	0.04407	0.07207	0.01144	0.00868	0.00404	0.00903	0.0471	0.1085
Women	mean	259.25	560.944	329.86	27.738	252.992	498.49	303.412	24.94	355.776	538.762	318.25	26.954	397.88	492.76	296.996	24.684	0.018764	0.021128	0.008812	0.013008	0.059306	0.07863	0.014256	0.02601	0.0064	0.011272	0.043618	0.062868	0.022066	0.03064	0.00932	0.010868	0.053254	0.065662	0.01164	0.029066	0.007174	0.011984	0.053918	0.0682
	SD	91.6287	121.406	68.5526	3.84341	145.331	87.6078	56.5503	1.85355	175.205	118.549	86.8143	3.06094	213.593	167.276	51.9696	5.66028	0.0150345	0.0179874	0.00436504	0.00782685	0.0218976	0.0260146	0.00893003	0.0230765	0.00224821	0.0042543	0.00996083	0.0251866	0.0163541	0.0189734	0.00582629	0.00395917	0.01136	0.0243329	0.0103138	0.0228975	0.00330017	0.00305397	0.00809462	0.0439924
Men	mean	295.244	769.289	376.66	36.4929	293.269	704.371	324.456	32.7814	429.151	665.656	395.04	33.3114	392.199	699.83	365.96	33.7471	0.0180329	0.01889	0.0110286	0.0144714	0.0625643	0.0647657	0.0181457	0.0197229	0.00869143	0.0123414	0.0640443	0.0375471	0.0186871	0.0270071	0.00876143	0.0165414	0.0622471	0.04906	0.0147614	0.0212186	0.00991857	0.0144514	0.0593529	0.0504771
	SD	242.598	212.356	249.276	11.9154	244.908	151.817	224.273	9.78481	443.691	198.66	325.985	14.7499	358.283	228.765	284.781	13.8745	0.0115149	0.0215528	0.00898585	0.00361658	0.0138134	0.0551127	0.0131289	0.0195554	0.00336915	0.00516948	0.01952	0.0167868	0.0109133	0.0265104	0.00249864	0.00703847	0.0200419	0.0238034	0.0100543	0.0206432	0.00908304	0.00589368	0.0291162	0.0340943
All	mean	280.247	682.478	357.16	32.845	276.487	618.587	315.688	29.5142	398.578	612.783	363.044	30.6625	394.566	613.551	337.225	29.9708	0.0183375	0.0198225	0.010105	0.0138617	0.0612067	0.0705425	0.016525	0.0223425	0.00773667	0.0118958	0.0555333	0.0480975	0.020095	0.0285208	0.00899417	0.0141775	0.0585	0.0559775	0.0134608	0.0244883	0.008775	0.0134233	0.0570883	0.0578617
	SD	195.306	207.358	196.819	10.3732	210.197	164.15	175.445	8.49861	359.075	181.083	257.997	11.8591	306.427	229.365	222.687	12.0668	0.0131018	0.0201743	0.00749898	0.00580303	0.017711	0.0458315	0.011724	0.0213206	0.00316287	0.00483818	0.0191055	0.0241771	0.0135532	0.0237312	0.00422631	0.00657671	0.0175425	0.0253814	0.0102791	0.0219546	0.00738206	0.00506244	0.0230001	0.0395071

## Sheet: Tower block
		Electromyography
		EMG1						EMG2						EMG3
	MRGlasses	Trapeze	Deltoïde	Long Biceps	Grand dorsal	Soléaire	Tibial	Trapeze	Deltoïde	Long Biceps	Grand dorsal	Soléaire	Tibial	Trapeze	Deltoïde	Long Biceps	Grand dorsal	Soléaire	Tibial
	S1	0.042	0.147	0.061	0.013	0.042	0.024	0.049	0.101	0.05	0.014	0.032	0.025	0.04	0.126	0.045	0.012	0.034	0.024
	S2	0.01939	0.01659	0.04391	0.00995	0.04528	0.02006	0.0119	0.00844	0.01865	0.00843	0.03996	0.01662	0.01202	0.01102	0.01801	0.00917	0.0519	0.01751
	S3	0.04995	0.15887	0.03057	0.01485	0.02704	0.02227	0.04878	0.16998	0.03195	0.01729	0.031	0.02682	0.04182	0.15404	0.03214	0.01387	0.02583	0.01264
	S4	0.04096	0.06759	0.0249	0.00785	0.01987	0.03651	0.032	0.04977	0.02091	0.16028	0.01624	0.03722	0.03887	0.04359	0.01944	0.00825	0.01842	0.03556
	S5	0.07685	0.14045	0.13592	0.01342	0.02214	0.02215	0.08117	0.12906	0.10581	0.01527	0.01886	0.01832	0.08977	0.11059	0.09678	0.0122	0.01768	0.01756
	S6	0.06123	0.10201	0.1195	0.0367	0.03446	0.03966	0.04426	0.09134	0.11792	0.04054	0.03268	0.02525	0.03809	0.08891	0.12133	0.02875	0.02864	0.02513
	S7	0.05638	0.07247	0.05315	0.01715	0.05772	0.01477	0.07676	0.09072	0.06639	0.01634	0.04929	0.0077	0.06515	0.07792	0.05485	0.01749	0.05476	0.01035
	S8	0.01095	0.09595	0.07281	0.01665	0.04123	0.01274	0.01106	0.08535	0.0706	0.01325	0.0416	0.00756	0.00803	0.08761	0.04377	0.01202	0.03954	0.00895
	S9	0.00528	0.05954	0.00899	0.01613	0.03562	0.02349	0.00577	0.09533	0.00804	0.01132	0.02956	0.01676	0.0055	0.05632	0.00788	0.01155	0.02557	0.01734
	S10	0.12364	0.07359	0.04904	0.01563	0.04535	0.01102	0.15213	0.10112	0.05206	0.01834	0.041	0.0218	0.15271	0.07977	0.04076	0.01671	0.04306	0.01669
	S11	0.03025	0.03952	0.07189	0.02084	0.04118	0.01092	0.02243	0.04049	0.04743	0.01171	0.03564	0.01515	0.02284	0.04605	0.05158	0.01276	0.02067	0.01116
	S12	0.02212	0.0777	0.11341	0.01259	0.03387	0.0058	0.02696	0.07784	0.10861	0.01766	0.02368	0.01526	0.01906	0.06936	0.0856	0.01192	0.02219	0.01104
Women	mean	0.04583	0.1061	0.05926	0.011814	0.031266	0.024998	0.04457	0.09165	0.045464	0.043054	0.027612	0.024796	0.044496	0.089048	0.042274	0.011098	0.029566	0.021454
	SD	0.0185293	0.0550136	0.0402967	0.00254523	0.0104175	0.00588998	0.0228133	0.057097	0.0321457	0.0586867	0.00882186	0.00731135	0.0251533	0.0533072	0.0289523	0.00207559	0.0126328	0.00792296
Men	mean	0.0442643	0.0743971	0.0698271	0.0193843	0.0413471	0.0169143	0.0484814	0.08317	0.0672929	0.0184514	0.0362071	0.01564	0.0444829	0.0722771	0.0579671	0.0158857	0.03349	0.01438
	SD	0.0378937	0.0195646	0.0354389	0.00741879	0.00774851	0.0105345	0.0477	0.0187028	0.0346811	0.00938358	0.007902	0.00609762	0.0480243	0.014884	0.0334564	0.00570692	0.011704	0.00530377
All	mean	0.0449167	0.0876067	0.0654242	0.01623	0.0371467	0.0202825	0.0468517	0.0867033	0.0581975	0.0287025	0.0326258	0.019455	0.0444883	0.079265	0.0514283	0.0138908	0.031855	0.0173275
	SD	0.0313254	0.0415766	0.0378992	0.006981	0.0102442	0.00975057	0.0393424	0.0397478	0.035327	0.040417	0.00931706	0.0080211	0.0401121	0.03717	0.0325893	0.00513468	0.0122534	0.00739781
		EMG1						EMG2						EMG3
	Control	Trapeze	Deltoïde	Long Biceps	Grand dorsal	Soléaire	Tibial	Trapeze	Deltoïde	Long Biceps	Grand dorsal	Soléaire	Tibial	Trapeze	Deltoïde	Long Biceps	Grand dorsal	Soléaire	Tibial
	S1	0.06172	0.03366	0.03149	0.00972	0.04274	0.011	0.04974	0.02874	0.03302	0.01219	0.04243	0.01428	0.04648	0.01057	0.0279	0.00789	0.02826	0.00928
	S2							0.01762	0.04578	0.00998	0.00679	0.02543	0.01498	0.01928	0.0469	0.01356	0.01052	0.04298	0.01878
	S3	0.0115	0.06172	0.04388	0.02954	0.02355	0.01291	0.01123	0.04752	0.04288	0.00802	0.01757	0.01061	0.01113	0.04878	0.03374	0.00928	0.02063	0.00995
	S4	0.02622	0.01483	0.01399	0.0097	0.01128	0.01906	0.03662	0.01216	0.01344	0.02611	0.01198	0.01724	0.03245	0.01033	0.01461	0.00726	0.0121	0.01139
	S5	0.02224	0.04224	0.02218	0.01515	0.01669	0.00706	0.02346	0.05308	0.02334	0.01821	0.04142	0.03196	0.01882	0.0431	0.00945	0.01399	0.01347	0.01323
	S6	0.04163	0.00979	0.0143	0.02137	0.01306	0.00948	0.04103	0.01276	0.01346	0.02161	0.01661	0.01053	0.03738	0.01322	0.01415	0.02009	0.01398	0.01087
	S7	0.02029	0.07008	0.01651	0.02611	0.04641	0.00458	0.02234	0.0698	0.01296	0.02505	0.05087	0.00745	0.02337	0.06985	0.01436	0.01876	0.03833	0.00948
	S8	0.04088	0.01105	0.01029	0.01986	0.04543	0.01243	0.03758	0.01428	0.00914	0.01783	0.03469	0.00525	0.04094	0.01224	0.0099	0.01624	0.0476	0.00659
	S9	0.0673	0.00799	0.02685	0.01059	0.02777	0.00992	0.04072	0.0397	0.03383	0.01319	0.02897	0.03401	0.04865	0.00618	0.02505	0.01157	0.01964	0.00984
	S10	0.03787	0.1685	0.07331	0.01595	0.04181	0.00635	0.02926	0.14758	0.04477	0.01577	0.03215	0.0093	0.03154	0.15538	0.03128	0.0159	0.03492	0.00621
	S11	0.04723	0.02103	0.01731	0.01061	0.02191	0.01293	0.0416	0.01994	0.01424	0.01122	0.01465	0.00688	0.04282	0.01446	0.01432	0.00791	0.01417	0.00865
	S12	0.02282	0.09933	0.04473	0.03668	0.02244	0.00961	0.01891	0.06691	0.04064	0.03023	0.01305	0.0109	0.03589	0.04722	0.0269	0.02554	0.00674	0.01328
Women	mean	0.0199867	0.0395967	0.0266833	0.01813	0.0171733	0.01301	0.0222325	0.039635	0.02241	0.0147825	0.0241	0.0186975	0.025632	0.031936	0.019852	0.009788	0.023488	0.012526
	SD	0.00621706	0.0192338	0.0126112	0.00836926	0.00502085	0.00489949	0.00936532	0.0160902	0.012795	0.0079005	0.0110825	0.00801944	0.0124754	0.0176386	0.00930501	0.00238512	0.0113219	0.00340796
Men	mean	0.0397171	0.0553957	0.0290429	0.0201671	0.0312614	0.00932857	0.0330629	0.0529957	0.0241486	0.0192714	0.0272843	0.0120457	0.0372271	0.0455071	0.0194229	0.0165729	0.0250543	0.00927429
	SD	0.0145828	0.0565852	0.0209565	0.0085388	0.0122489	0.00278931	0.0088248	0.044416	0.0139069	0.00626895	0.0126142	0.00916177	0.00757555	0.0497526	0.00754343	0.00532113	0.01408	0.00226588
All	mean	0.033798	0.050656	0.028335	0.019556	0.027035	0.010433	0.0291245	0.0481373	0.0235164	0.0176391	0.0261264	0.0144645	0.0323958	0.0398525	0.0196017	0.0137458	0.0244017	0.0106292
	SD	0.015563	0.0490379	0.018876	0.00853948	0.0124204	0.00393622	0.0104209	0.0372942	0.013539	0.00723666	0.0121764	0.00932951	0.0114457	0.0402286	0.00832555	0.00548415	0.013025	0.00322555

## Sheet: Feuil1
	pain feeling						comfortable	dependent or autonomous	used in working situation	visual fatigue		loss balance	loss of real environemen	loss of time
	during			after						during	after
	head/neck	back	leg	head/neck	back	leg				Fatigue visuelle	Fatigue visuelle		yes - no
S1	medium	no	no	medium	no	no	incomfortable	dependent	no	no	no	no	no	yes
S2	medium	no	no	legere	no	no	incomfortable	dependent	no	normal	yes	no	no	yes
S3	no	no	no	no	no	no	comfortable	autonomous	yes	normal	normal	no	yes	yes
S4	no	no	no	no	no	no	comfortable	autonomous	yes	normal	no	no	yes	no
S5	no	no	no	no	no	no	comfortable	autonomous	yes	no	no	no	yes	yes
S6	no	no	no	no	no	no	comfortable	autonomous	yes	no	no	no	no	yes
S7	no	no	no	no	no	no	comfortable	autonomous	no	normal	no	no	no	no
S8	no	no	no	no	no	no	comfortable	autonomous	yes	no	no	no	no	yes
S9	no	no	no	no	no	no	comfortable	autonomous	yes	no	no	no	yes	no
S10	no	no	no	no	no	no	comfortable	autonomous	yes	no	no	no	no	no
S11	medium	no	no	no	no	no	comfortable	autonomous	yes	no	no	no	no	yes
S12	medium	no	no	no	no	no	comfortable	autonomous	yes	no	no	no	no	no
